# Supplementary material for: Characteristics of Fatal Poisonings Among Infants and Young Children in the United States
Source: Oxford University Press journal article supplement (doi:10.1542/peds.2022-059016), 2023-03-08
Supplement: peds_2022059016supplementarydata.pdf [file peds_2022059016supplementarydata.pdf]

## Supplemental Information

### Supplemental Information 1 NFR-CRS Variable Recategorization and Coding List

Age was provided as single integers (<1, 1, 2, 3, 4, 5) in the source data. The variables recoded in this study are provided below. Labels in parentheses represent NFR-CRS variables collapsed into the named variable.

1. Race and ethnicity
  - a. Non-Hispanic white
  - b. Non-Hispanic Black
  - c. Hispanic (including white, Black, other race(s), and multiracial)
  - d. Non-Hispanic, other race, or multiracial

Location of incident

- a. Child's home
- b. Friend or relative's home
- c. All other location variables

Type of maltreatment documented (if child had a history of maltreatment)

- a. Physical
- b. Neglect
- c. Other or unspecified (including sexual, emotional/psychological, and unknown maltreatment type)

Primary supervisor at the time of incident

- a. Biological parent (including biological mother and father)
- b. Grandparent
- c. Other relative (including other relative, sibling)
- d. Babysitter or licensed child care worker
- e. Nonbiological parent (including foster, step, or adoptive parent)
- f. Other (including self, parental partner, friend/acquaintance, institutional staff, or other)

Substance storage location

- a. Open area
- b. Cabinet (including open cabinet and closed cabinet, locked or unlocked)
- c. Other

Circumstances surrounding a fatal poisoning

- a. Accidental overdose
- b. Deliberate poisoning
- c. Other (including adverse effect, but not overdose, medical treatment mishap, or acute intoxication)

The NFR-CRS contains multiple categories for logging substances contributing to death that are divided into 3 major categories—prescription, OTC, and illicit. For our study, substances were recategorized on the basis of drug

class or mechanism of action into the following categories:

- a. Opioids (including prescription opiates, methadone, illicit opiates, illicit methadone, and illicit heroin)
- b. OTC pain, cough, and allergy medications (including OTC pain medications [eg, acetaminophen, ibuprofen, acetylsalicylic acid], and cough/cold/allergy medications [eg, diphenhydramine, dextromethorphan])
- c. Other/unspecified illicit drugs (including illicit nonopioid pain medications and other illicit drugs)
- d. Other/unspecified OTC or prescription drug (including nonopioid pain medications, other prescription drugs, other OTC drugs)
- e. Other substance/toxin (including other gases and other substances)
- f. Carbon monoxide
- g. Amphetamines
- h. Antidepressants
- i. Cocaine
- j. Alcohol

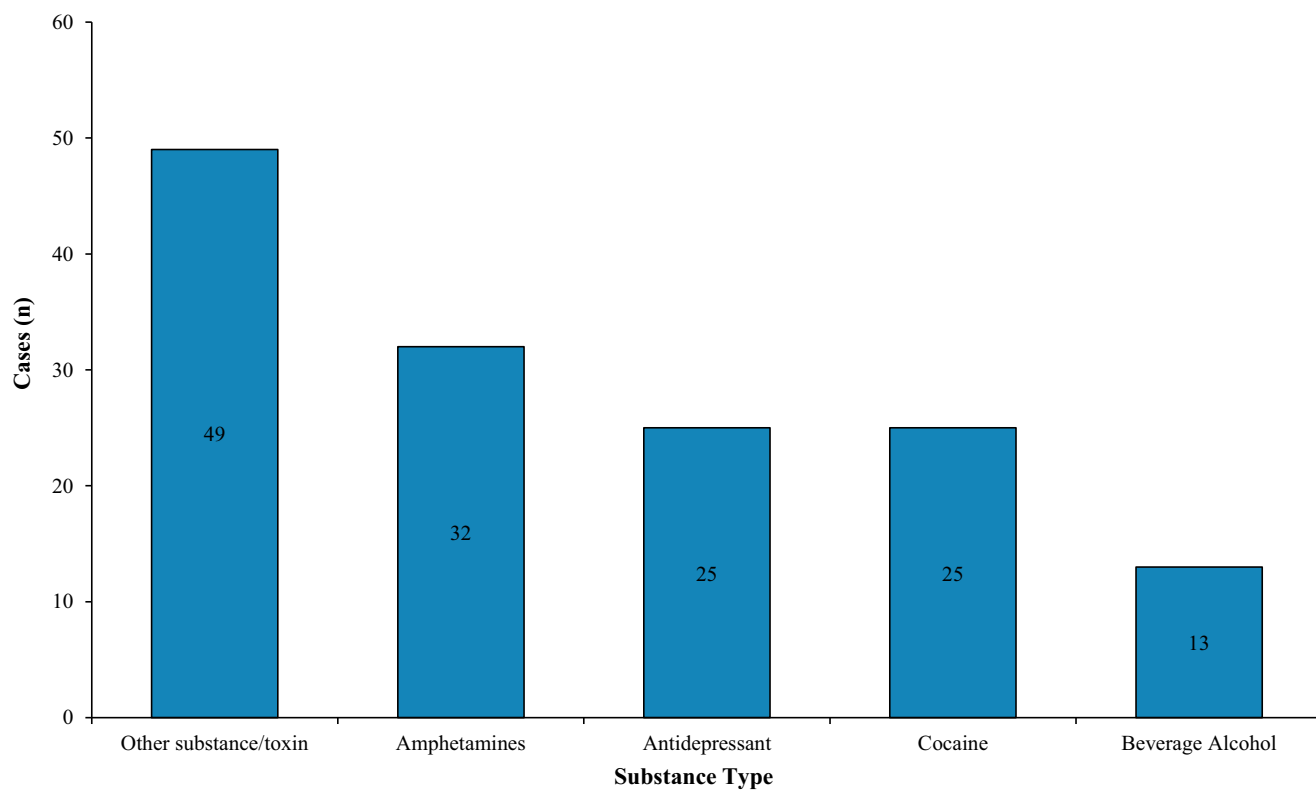

**SUPPLEMENTAL FIGURE 3**

Fatal Pediatric Poisonings by Remaining Contributing Substances, NFR-CRS, 2005–2018.

Total number of fatalities, 731.

\*Per-state data-use agreements; age breakdown was not provided to suppress presentation of counts  $\leq 5$ . †CDR committees may identify  $>1$  substance as contributing to death in a single case.
